# Supplementary material for: Zinc oxide nanocrystals as electron injecting building blocks for plastic light sources
Source: Royal Society of Chemistry journal article supplement (doi:10.1039/c2jm15584b), 2012-01-01
Supplement: c2jm15584b.pdf [file c2jm15584b.pdf]

# Zinc oxide nanocrystals as electron injecting building blocks for plastic light sources

## Supporting Information

Michele Sessolo,<sup>a</sup> Henk J. Bolink,<sup>\*ab</sup> Hicham Brine<sup>a</sup>, Helena Prima-Garcia<sup>a</sup> and Ramon Tena-Zaera<sup>\*c</sup>

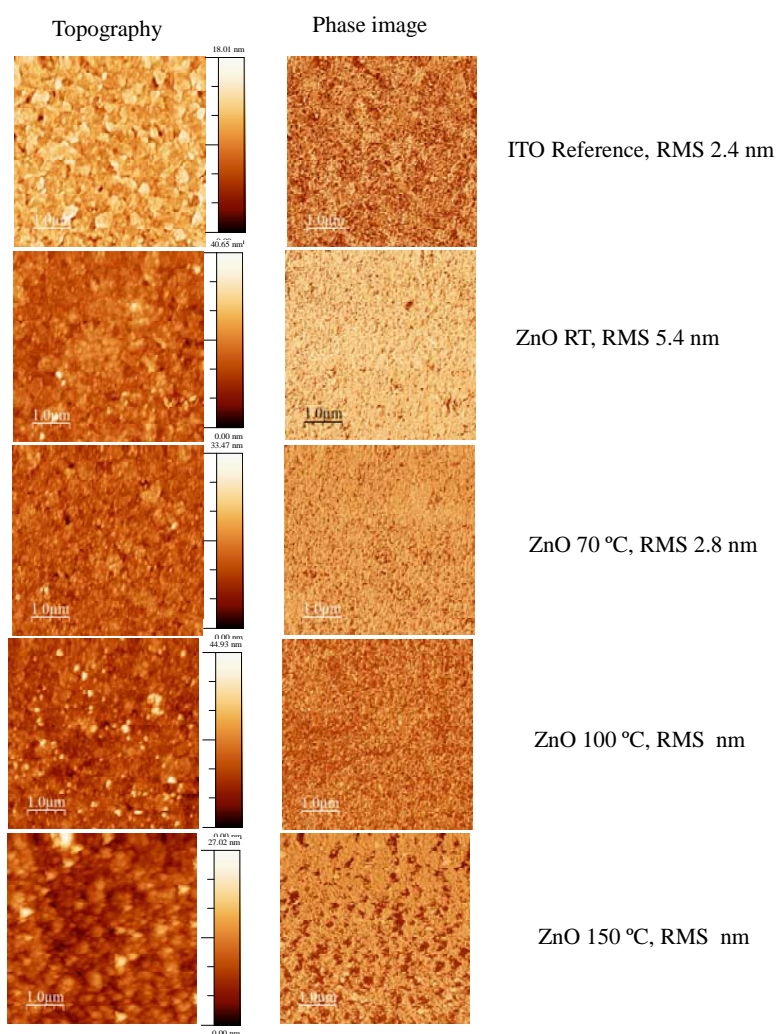

Fig. S1 AFM topographies (left) and corresponding phase images (right) registered for the ITO substrate and the ZnO NCs layers annealed at different temperatures.

<sup>a</sup>Instituto de Ciencia Molecular, Universidad de València  
PO Box 22085, ES-46071 Valencia, Spain. Email: henk.bolink@uv.es

<sup>b</sup>Fundació General de la Universitat de València (FGUV)  
PO Box 22085, ES-46071 Valencia, Spain.

<sup>c</sup>Energy Department, CIDETEC-IK4  
Parque Tecnológico de San Sebastián, Paseo Miramón 196  
Donostia-San Sebastián, 20009, Spain. Email: rtena@cidetec.es

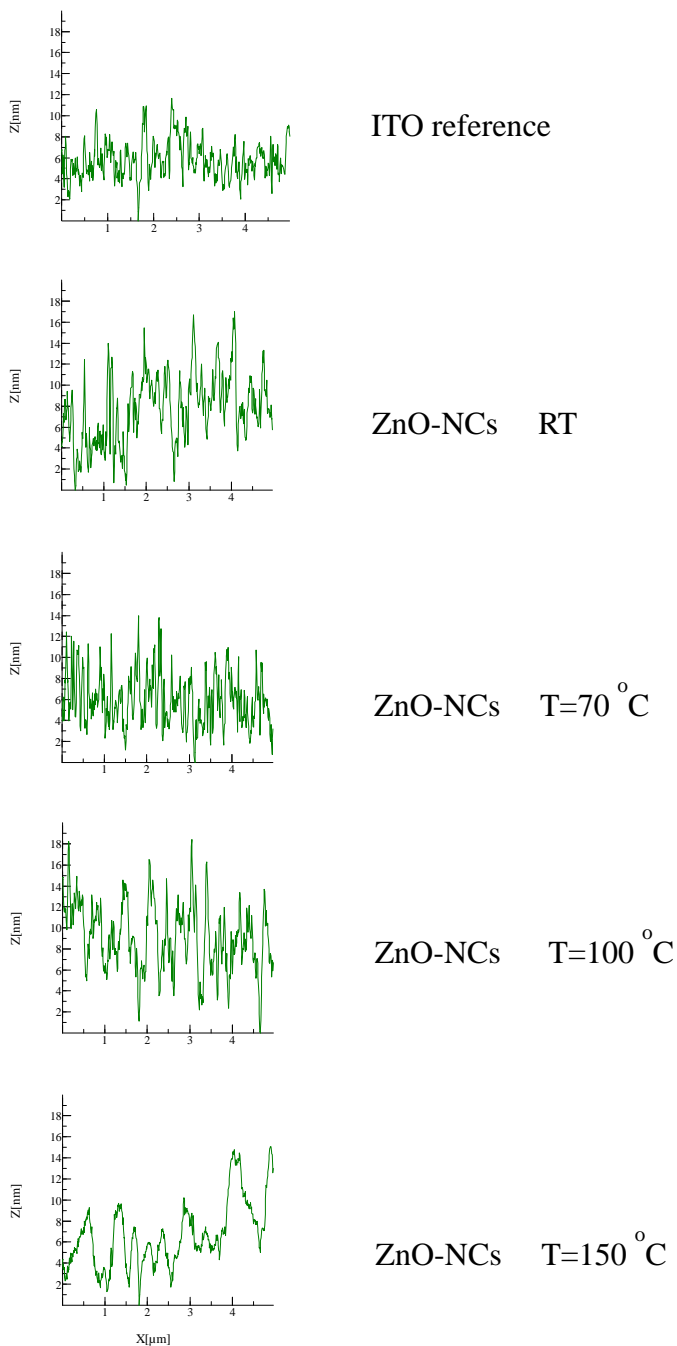

Fig. S2. Topology profile (peak to valley) of the AFM images presented in Fig. S1.

To complete the HRTEM images below the image obtained for samples annealed at  $100^\circ\text{C}$  is depicted. The images for room temperature and  $150^\circ\text{C}$  are displayed in the manuscript (Fig. 1 and 3, respectively).

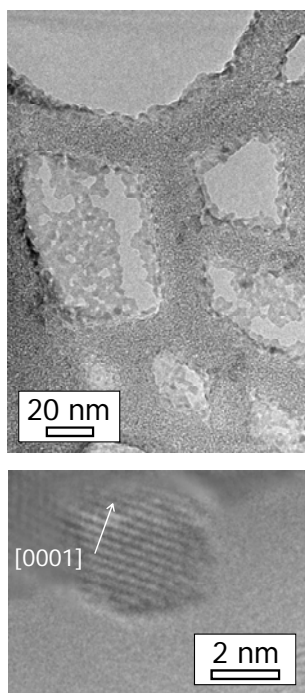

Fig. S3. HRTEM image of the ZnO NCs annealed at 100 °C, with a higher magnification image of a single ZnO NC.

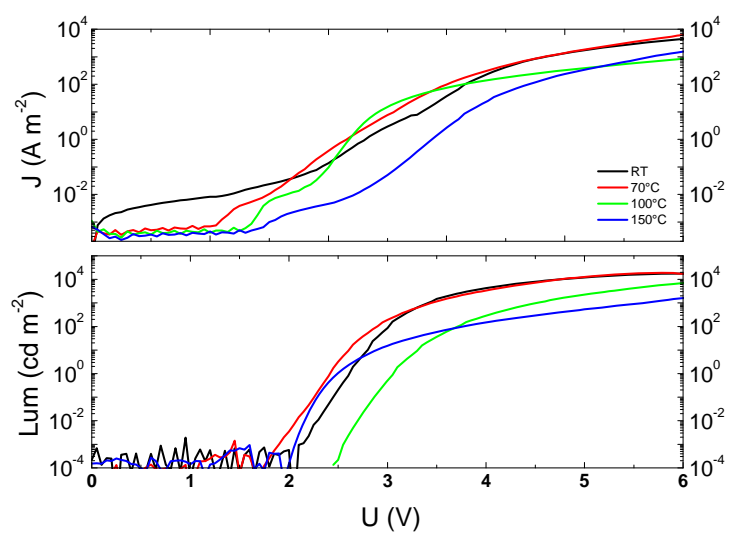

Fig. S4. Current density and luminance for a series of HyLEDs employing ZnO NCs layers treated at different temperatures
